# Supplementary material for: Spinal Cord Motion in Degenerative Cervical Myelopathy: The Level of the Stenotic Segment and Gender Cause Altered Pathodynamics
Source: MDPI journal article supplement (doi:10.3390/jcm10173788), 2021-08-25
Supplement: s1 [file s1]

Table S1. Spinal cord motion data per group and segment.

| Group | Segment |          | Max. Velocity (cm/s) |     |          | ptp-Amplitude (mm/s) |     |          | Total Displacement (mm) |     |          | C2-pAI |     |          | C7-pAI |     |          |
|-------|---------|----------|----------------------|-----|----------|----------------------|-----|----------|-------------------------|-----|----------|--------|-----|----------|--------|-----|----------|
|       |         |          | Mean                 | SD  | <i>p</i> | Mean                 | SD  | <i>p</i> | Mean                    | SD  | <i>p</i> | Mean   | SD  | <i>p</i> | Mean   | SD  | <i>p</i> |
| C2/C3 | C2/C3   | patients | 0.48                 | 0.2 | 0.728    | 6.95                 | 2.6 | 0.741    |                         |     |          |        |     |          | 1.69   | 0.2 | 0.255    |
|       |         | controls | 0.42                 | 0.1 |          | 6.26                 | 0.0 |          |                         |     |          |        |     |          | 1.02   | 0.6 |          |
|       | C3/C4   | patients | 0.71                 | 0.3 | 0.372    | 9.66                 | 5.0 | 0.482    | 0.54                    | 0.3 | 0.071    | 1.35   | 0.2 | 0.255    | 2.30   | 0.7 | 0.237    |
|       |         | controls | 0.43                 | 0.1 |          | 6.58                 | 1.1 |          | 1.21                    | 0.0 |          | 1.05   | 0.2 |          | 1.11   | 0.7 |          |
|       | C4/C5   | patients | 0.54                 | 0.2 | 0.766    | 8.70                 | 5.4 | 0.750    | 0.67                    | 0.3 | 0.246    | 1.19   | 0.3 | 0.906    | 2.04   | 0.8 | 0.518    |
|       |         | controls | 0.47                 | 0.2 |          | 7.11                 | 3.0 |          | 0.98                    | 0.1 |          | 1.13   | 0.5 |          | 1.28   | 1.1 |          |
|       | C5/C6   | patients | 0.51                 | 0.1 | 0.831    | 8.83                 | 4.4 | 0.752    | 1.13                    | 0.7 | 0.697    | 1.24   | 0.2 | 0.959    | 2.11   | 0.6 | 0.329    |
|       |         | controls | 0.49                 | 0.0 |          | 7.69                 | 0.3 |          | 1.35                    | 0.0 |          | 1.23   | 0.0 |          | 1.26   | 0.7 |          |
|       | C6/C7   | patients | 0.29                 | 0.2 | 0.439    | 4.55                 | 2.8 | 0.358    | 0.52                    | 0.1 | 0.175    | 0.62   | 0.2 | 0.070    | 1.07   | 0.4 | 0.949    |
|       |         | controls | 0.43                 | 0.0 |          | 6.94                 | 0.5 |          | 1.22                    | 0.5 |          | 1.11   | 0.1 |          | 1.10   | 0.5 |          |
|       | C7/T1   | patients | 0.23                 | 0.1 | 0.480    | 4.06                 | 1.0 | 0.381    | 0.56                    | 0.1 | 0.228    | 0.60   | 0.1 | 0.340    |        |     |          |
|       |         | controls | 0.42                 | 0.3 |          | 7.21                 | 3.9 |          | 1.53                    | 0.8 |          | 1.15   | 0.6 |          |        |     |          |
| C3/C4 | C2/C3   | patients | 0.61                 | 0.6 | 0.472    | 8.33                 | 8.0 | 0.651    |                         |     |          |        |     |          | 1.12   | 0.8 | 0.525    |
|       |         | controls | 0.42                 | 0.1 |          | 6.62                 | 1.3 |          |                         |     |          |        |     |          | 0.86   | 0.4 |          |
|       | C3/C4   | patients | 0.68                 | 0.6 | 0.342    | 9.53                 | 8.1 | 0.480    | 1.15                    | 0.8 | 0.869    | 1.15   | 0.3 | 1.000    | 1.25   | 0.7 | 0.493    |
|       |         | controls | 0.43                 | 0.1 |          | 6.98                 | 2.7 |          | 1.10                    | 0.2 |          | 1.12   | 0.2 |          | 1.02   | 0.4 |          |
|       | C4/C5   | patients | 0.55                 | 0.5 | 0.945    | 9.17                 | 7.8 | 0.831    | 1.12                    | 0.8 | 0.927    | 1.07   | 0.7 | 0.310    | 1.10   | 0.5 | 0.701    |
|       |         | controls | 0.53                 | 0.2 |          | 8.39                 | 3.7 |          | 1.09                    | 0.2 |          | 1.38   | 0.4 |          | 1.21   | 0.4 |          |
|       | C5/C6   | patients | 0.44                 | 0.3 | 0.734    | 8.14                 | 5.8 | 0.886    | 1.19                    | 0.7 | 0.902    | 1.10   | 0.6 | 0.400    | 1.04   | 0.3 | 0.408    |
|       |         | controls | 0.50                 | 0.2 |          | 8.55                 | 3.5 |          | 1.15                    | 0.4 |          | 1.35   | 0.3 |          | 1.24   | 0.5 |          |
|       | C6/C7   | patients | 0.39                 | 0.2 | 0.853    | 6.81                 | 4.3 | 0.627    | 0.92                    | 0.4 | 0.342    | 0.94   | 0.4 | 0.147    | 0.92   | 0.3 | 0.271    |
|       |         | controls | 0.42                 | 0.2 |          | 7.87                 | 2.9 |          | 1.14                    | 0.3 |          | 1.30   | 0.2 |          | 1.11   | 0.3 |          |
|       | C7/T1   | patients | 0.45                 | 0.4 | 0.847    | 8.04                 | 6.7 | 0.866    | 1.34                    | 1.2 | 0.813    | 1.25   | 0.7 | 0.938    |        |     |          |
|       |         | controls | 0.42                 | 0.2 |          | 7.51                 | 3.2 |          | 1.21                    | 0.5 |          | 1.28   | 0.4 |          |        |     |          |
| C4/C5 | C2/C3   | patients | 0.49                 | 0.2 | 0.761    | 9.46                 | 4.7 | 0.071    |                         |     |          |        |     |          | 1.03   | 0.5 | 1.000    |
|       |         | controls | 0.46                 | 0.2 |          | 6.73                 | 1.7 |          |                         |     |          |        |     |          | 0.99   | 0.4 |          |

|       |       |          |      |     |       |       |     |       |      |     |       |      |     |       |      |     |              |
|-------|-------|----------|------|-----|-------|-------|-----|-------|------|-----|-------|------|-----|-------|------|-----|--------------|
|       | C3/C4 | patients | 0.70 | 0.2 | 0.017 | 11.16 | 4.3 | 0.011 | 1.47 | 0.7 | 0.040 | 1.34 | 0.6 | 0.574 | 1.34 | 0.6 | 0.376        |
|       |       | controls | 0.48 | 0.2 |       | 7.40  | 2.6 |       | 1.07 | 0.2 |       | 1.13 | 0.2 |       | 1.16 | 0.4 |              |
|       | C4/C5 | patients | 0.85 | 0.5 | 0.030 | 13.80 | 6.7 | 0.007 | 1.88 | 1.1 | 0.012 | 1.65 | 0.9 | 0.160 | 1.68 | 0.7 | <b>0.032</b> |
|       |       | controls | 0.52 | 0.2 |       | 7.94  | 3.3 |       | 1.04 | 0.3 |       | 1.23 | 0.3 |       | 1.21 | 0.3 |              |
|       | C5/C6 | patients | 0.77 | 0.4 | 0.033 | 12.46 | 6.1 | 0.028 | 1.71 | 1.0 | 0.054 | 1.56 | 1.2 | 0.769 | 1.54 | 0.6 | 0.180        |
|       |       | controls | 0.48 | 0.3 |       | 8.07  | 3.5 |       | 1.06 | 0.3 |       | 1.22 | 0.3 |       | 1.24 | 0.4 |              |
|       | C6/C7 | patients | 0.58 | 0.4 | 0.274 | 9.61  | 5.9 | 0.701 | 1.32 | 0.8 | 0.943 | 1.09 | 0.6 | 0.496 | 1.11 | 0.4 | 1.000        |
|       |       | controls | 0.45 | 0.2 |       | 7.89  | 3.1 |       | 1.16 | 0.4 |       | 1.22 | 0.3 |       | 1.20 | 0.3 |              |
|       | C7/T1 | patients | 0.51 | 0.3 | 0.167 | 8.82  | 4.2 | 0.157 | 1.38 | 0.8 | 0.309 | 1.05 | 0.4 | 0.673 |      |     |              |
|       |       | controls | 0.39 | 0.2 |       | 6.85  | 2.8 |       | 1.12 | 0.5 |       | 1.11 | 0.3 |       |      |     |              |
| C5/C6 | C2/C3 | patients | 0.42 | 0.2 | 0.341 | 6.30  | 2.9 | 0.390 |      |     |       |      |     |       | 0.96 | 0.6 | <b>0.009</b> |
|       |       | controls | 0.47 | 0.2 |       | 6.86  | 2.3 |       |      |     |       |      |     |       | 1.20 | 0.5 |              |
|       | C3/C4 | patients | 0.54 | 0.2 | 0.890 | 8.07  | 3.1 | 0.879 | 1.07 | 0.4 | 0.837 | 1.40 | 0.6 | 0.047 | 1.26 | 0.6 | 0.263        |
|       |       | controls | 0.53 | 0.2 |       | 7.96  | 2.9 |       | 1.06 | 0.2 |       | 1.16 | 0.2 |       | 1.40 | 0.6 |              |
|       | C4/C5 | patients | 0.66 | 0.3 | 0.039 | 10.47 | 4.0 | 0.011 | 1.38 | 0.6 | 0.003 | 1.95 | 0.9 | 0.000 | 1.60 | 0.6 | 0.148        |
|       |       | controls | 0.52 | 0.2 |       | 8.09  | 3.3 |       | 1.02 | 0.3 |       | 1.18 | 0.3 |       | 1.40 | 0.5 |              |
|       | C5/C6 | patients | 0.88 | 0.5 | 0.000 | 13.44 | 6.4 | 0.000 | 1.68 | 1.0 | 0.001 | 2.51 | 1.4 | 0.000 | 2.04 | 0.7 | <b>0.000</b> |
|       |       | controls | 0.50 | 0.2 |       | 7.89  | 3.3 |       | 0.99 | 0.3 |       | 1.16 | 0.3 |       | 1.34 | 0.5 |              |
|       | C6/C7 | patients | 0.62 | 0.3 | 0.002 | 9.95  | 3.9 | 0.002 | 1.31 | 0.6 | 0.026 | 1.95 | 1.1 | 0.000 | 1.49 | 0.4 | <b>0.004</b> |
|       |       | controls | 0.42 | 0.2 |       | 7.16  | 3.1 |       | 1.03 | 0.3 |       | 1.07 | 0.4 |       | 1.20 | 0.3 |              |
|       | C7/T1 | patients | 0.41 | 0.2 | 0.287 | 7.06  | 3.2 | 0.295 | 1.08 | 0.4 | 0.595 | 1.29 | 0.5 | 0.008 |      |     |              |
|       |       | controls | 0.36 | 0.2 |       | 6.27  | 2.7 |       | 1.03 | 0.4 |       | 0.95 | 0.3 |       |      |     |              |
| C6/C7 | C2/C3 | patients | 0.47 | 0.3 | 0.867 | 6.91  | 3.5 | 1.000 |      |     |       |      |     |       | 0.62 | 0.2 | <b>0.019</b> |
|       |       | controls | 0.49 | 0.2 |       | 6.91  | 2.7 |       |      |     |       |      |     |       | 1.29 | 0.7 |              |
|       | C3/C4 | patients | 0.58 | 0.3 | 0.559 | 9.04  | 4.7 | 0.555 | 1.22 | 0.6 | 0.652 | 1.28 | 0.1 | 0.174 | 0.78 | 0.3 | <b>0.015</b> |
|       |       | controls | 0.50 | 0.3 |       | 7.92  | 3.5 |       | 1.12 | 0.3 |       | 1.15 | 0.2 |       | 1.46 | 0.7 |              |
|       | C4/C5 | patients | 0.68 | 0.5 | 0.420 | 10.43 | 6.5 | 0.394 | 1.26 | 0.7 | 0.333 | 1.35 | 0.3 | 0.295 | 0.84 | 0.3 | <b>0.030</b> |
|       |       | controls | 0.54 | 0.3 |       | 8.29  | 4.3 |       | 1.03 | 0.3 |       | 1.20 | 0.3 |       | 1.55 | 0.9 |              |
|       | C5/C6 | patients | 0.90 | 0.6 | 0.054 | 13.32 | 7.9 | 0.082 | 1.56 | 0.8 | 0.060 | 1.79 | 0.4 | 0.003 | 1.08 | 0.3 | 0.141        |
|       |       | controls | 0.50 | 0.3 |       | 8.09  | 4.3 |       | 1.02 | 0.3 |       | 1.17 | 0.3 |       | 1.43 | 0.6 |              |
|       | C6/C7 | patients | 1.16 | 0.6 | 0.001 | 17.69 | 7.5 | 0.001 | 1.99 | 0.8 | 0.002 | 2.71 | 0.9 | 0.000 | 1.57 | 0.5 | 0.216        |

|       |          |      |     |       |       |     |       |      |     |       |      |     |       |      |     |
|-------|----------|------|-----|-------|-------|-----|-------|------|-----|-------|------|-----|-------|------|-----|
|       | controls | 0.43 | 0.2 |       | 7.31  | 3.7 |       | 1.01 | 0.3 |       | 1.05 | 0.3 |       | 1.28 | 0.5 |
| C7/T1 | patients | 0.79 | 0.5 | 0.037 | 12.88 | 7.9 | 0.038 | 1.59 | 0.8 | 0.071 | 1.84 | 0.7 | 0.008 |      |     |
|       | controls | 0.39 | 0.3 |       | 6.57  | 4.1 |       | 1.00 | 0.6 |       | 0.98 | 0.4 |       |      |     |

Max.: maximum, ptp: peak-to-peak, pAI: peak-to-peak amplitude index = peak-to-peak amplitude per segment referenced to the individual's peak-to-peak amplitude at C2/C3 (C2-pAI) or C7/T1 (C7-pAI) ; SD: standard deviation. Significant differences ( $p < 0.05$ ) are indicated in bold lettering.
